# Supplementary material for: Design of feature selection algorithm for high-dimensional network data based on supervised discriminant projection
Source: PeerJ Comput Sci. 2023 Jun 26;9:e1447. doi: 10.7717/peerj-cs.1447 (PMC10319262; doi:10.7717/peerj-cs.1447)
Supplement: Supplemental Information 2 [file peerj-cs-09-1447-s002.xlsx]

## Sheet: Sheet1
Number of experiments	Reference [4] algorithm	Reference [5] algorithm	Reference [6] algorithm	Algorithm of this paper
20	65.3	86.9	75.9	98.7
40	75.1	86.7	76.3	95.7
60	56.8	87.6	75.4	97.6
80	64.7	87.5	78.1	97.4
100	62.3	83.5	74.6	98.5
120	68.7	86.9	72.3	96.7
140	66.5	85.7	74.6	95.8
average value	65.6	86.4	75.3	97.2
数据来源：实验过程数据

## Sheet: Sheet2
Number of experiments	Reference [4] algorithm	Reference [5] algorithm	Reference [6] algorithm	Algorithm of this paper
20	76.8	89.3	65.8	96.8
40	74.9	85.6	69.7	97.4
60	75.6	86.7	68.4	95.8
80	74.8	89.7	71.3	96.3
100	72.3	88.1	72.2	91.7
120	79.6	87.6	71.6	95.5
140	74.1	85.4	74.3	96.7
average value	75.4	87.5	70.5	95.7
数据来源：实验过程数据

## Sheet: Sheet3
Number of experiments	Reference [4] algorithm	Reference [5] algorithm	Reference [6] algorithm	Algorithm of this paper
20	70.6	88.1	70.4	97.7
40	75	86.1	72.9	96.5
60	64.9	87.1	71.7	96.7
80	69.3	88.6	74.5	96.8
100	66.9	85.7	73.4	95
120	73.7	87.2	71.9	96.1
140	70.1	85.5	74.4	96.2
average value	70.1	86.9	72.7	96.4
数据来源：实验过程数据

## Sheet: Sheet4
Number of samples	Reference [4] algorithm	Reference [5] algorithm	Reference [6] algorithm	Algorithm of this paper
2000	88.2	86.6	84.3	98.7
4000	87.5	85.7	83.6	97.8
6000	86.3	85.1	81.7	97.6
8000	84.7	87.6	79.1	97.1
10000	83.6	87.1	78.7	96.9
12000	81.1	86.2	76.4	96.4
14000	80.2	85.7	74.1	96.2
16000	79.4	85.4	71.4	96.5
20000	78.2	83.7	69.8	95.1
average value	83.2	85.9	77.7	96.9
数据来源：实验过程数据

## Sheet: Sheet5
Number of samples	Reference [4] algorithm	Reference [5] algorithm	Reference [6] algorithm	Algorithm of this paper
2000	156	89	156	53
4000	158	98	163	56
6000	163	112	166	57
8000	168	125	179	62
10000	179	136	182	66
12000	188	147	199	68
14000	196	158	201	72
16000	213	169	236	75
20000	225	178	247	77
average value	182.8	134.7	192.1	65.1
数据来源：实验过程数据
